# Supplementary material
Source: PubMed Central journal article supplement (PMC8111559)
Supplement: jamapediatr-e210747-s001.pdf [file jamapediatr-e210747-s001.pdf]

## Supplementary Online Content

Galbraith AA, Ross-Degnan D, Zhang F, et al. Controller medication use and exacerbations for children with asthma in high-deductible plans. *JAMA Pediatr.* Published online May 10, 2021. doi:10.1001/jamapediatrics.2021.0747

**eFigure 1.** Study Cohort Selection

**eTable 1.** Baseline Characteristics of Children and Adults in the Study Population, Before Matching

**eFigure 2.** Aggregate Interrupted Time Series Regression Results for Monthly 30-day Fill Rates for High-Deductible Health Plan (HDHP) and Control Enrollees and the Difference Between Them From Baseline Period (Months 1 – 12) to Follow-Up Period (Months 13-24)

**eFigure 3.** Aggregate Interrupted Time Series Regression Results for Monthly Rates of Asthma Exacerbations (Oral Steroid Bursts (OCS) and Asthma-Related Emergency Department (ED) Visits) for High-Deductible Health Plan (HDHP) and Control Enrollees and the Difference Between Them From Baseline Period (Months 1 – 12) to Follow-Up Period (Months 13-24)

**eTable 2.** Adjusted Rates of Asthma Controller Medication Use, Adherence, and Exacerbations Before and After Switching to an HDHP Compared With a Control Group Remaining in a Traditional Plan, Among Adults and Children With Three or More Controller Fills

**eTable 3.** Adjusted Rates of Asthma Controller Medication Use, Adherence, and Exacerbations Before and After Switching to an HDHP Compared With a Control Group Remaining in a Traditional Plan, Among Adults and Children Between 2009-2014

This supplementary material has been provided by the authors to give readers additional information about their work.

**eFigure 1. Study Cohort Selection**

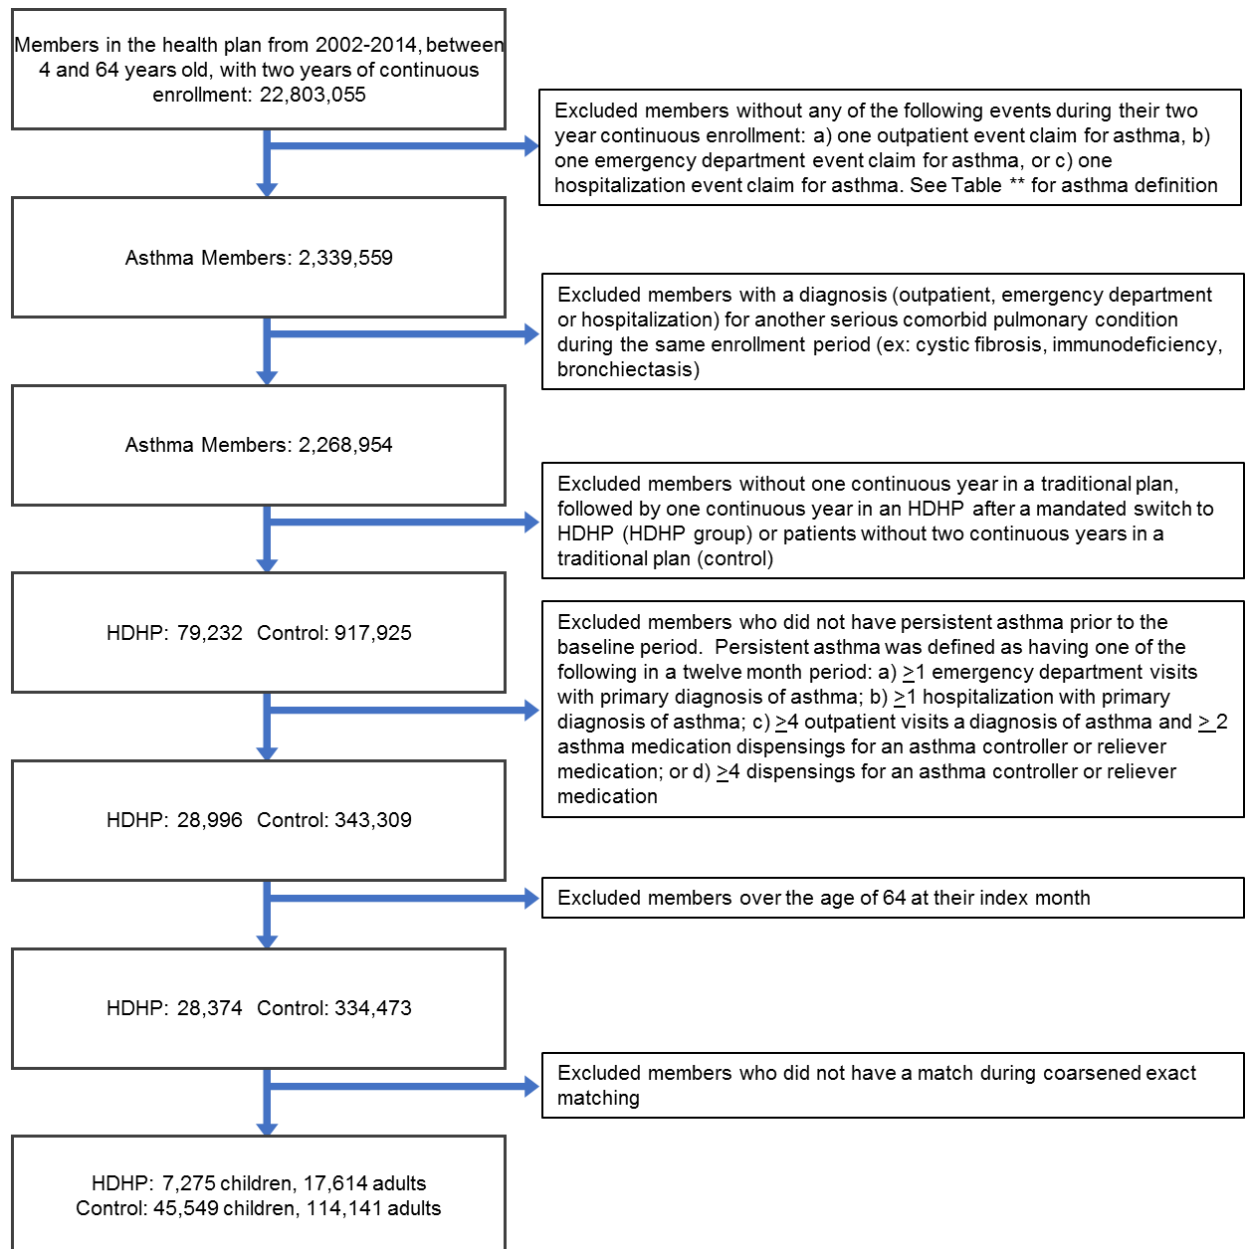

**eTable 1.** Baseline Characteristics of Children and Adults in the Study Population, Before Matching

|                                                           | Children, No. (%) |        |                        |        |               | Adults, No. (%)    |        |                        |        |               |
|-----------------------------------------------------------|-------------------|--------|------------------------|--------|---------------|--------------------|--------|------------------------|--------|---------------|
|                                                           | HDHP<br>(n=7,961) |        | Control<br>(n=101,214) |        | Std.<br>diff. | HDHP<br>(n=20,413) |        | Control<br>(n=233,259) |        | Std.<br>diff. |
| <b>Age as of Index Date</b>                               |                   |        |                        |        | -             |                    |        |                        |        | 0.107         |
| 4-16                                                      | 7,961             | (100)  | 101,214                | (100)  |               | -                  | -      | -                      | -      |               |
| 17-29                                                     | -                 | -      | -                      | -      |               | 4396               | (21.5) | 53689                  | (23.0) |               |
| 30-39                                                     | -                 | -      | -                      | -      |               | 3560               | (17.4) | 44481                  | (19.1) |               |
| 40-49                                                     | -                 | -      | -                      | -      |               | 5655               | (27.7) | 61008                  | (26.2) |               |
| 50-64                                                     | -                 | -      | -                      | -      |               | 6802               | (33.3) | 74081                  | (31.8) |               |
| <b>Female</b>                                             | 3140              | (39.4) | 40648                  | (40.2) | -0.015        | 12337              | (60.4) | 143665                 | (61.6) | -0.024        |
| <b>Race/ethnicity<sup>a</sup></b>                         |                   |        |                        |        | 0.211         |                    |        |                        |        | 0.137         |
| Hispanic                                                  | 781               | (9.8)  | 11417                  | (11.3) |               | 1567               | (7.7)  | 19496                  | (8.4)  |               |
| Asian                                                     | 217               | (2.7)  | 4603                   | (4.6)  |               | 356                | (1.7)  | 6605                   | (2.8)  |               |
| Non-Hispanic Black                                        | 75                | (0.9)  | 2177                   | (2.2)  |               | 296                | (1.5)  | 5481                   | (2.4)  |               |
| Mixed                                                     | 1228              | (15.4) | 20457                  | (20.2) |               | 3788               | (18.6) | 50927                  | (21.8) |               |
| Non-Hispanic White                                        | 5653              | (71.1) | 62481                  | (61.8) |               | 14389              | (70.5) | 150581                 | (64.6) |               |
| <b>Percent of neighborhood without high school degree</b> |                   |        |                        |        | 0.095         |                    |        |                        |        | 0.083         |
| <15.0                                                     | 6342              | (79.8) | 79272                  | (78.4) |               | 15489              | (76.0) | 178970                 | (76.8) |               |
| 15.0-24.9                                                 | 1090              | (13.7) | 14513                  | (14.4) |               | 3307               | (16.2) | 36950                  | (15.9) |               |
| 25.0-39.9                                                 | 419               | (5.3)  | 5856                   | (5.8)  |               | 1266               | (6.2)  | 14056                  | (6.0)  |               |
| ≥40.0                                                     | 96                | (1.2)  | 1473                   | (1.5)  |               | 324                | (1.6)  | 3077                   | (1.3)  |               |
| <b>Percent of neighborhood below poverty</b>              |                   |        |                        |        | 0.067         |                    |        |                        |        | 0.078         |
| <5.0                                                      | 2581              | (32.5) | 35111                  | (34.7) |               | 5546               | (27.2) | 69071                  | (29.6) |               |
| 5.0-9.9                                                   | 2356              | (29.6) | 28445                  | (28.1) |               | 5783               | (28.4) | 65880                  | (28.3) |               |
| 10.0-19.9                                                 | 2078              | (26.1) | 24878                  | (24.6) |               | 5806               | (28.5) | 63782                  | (27.4) |               |
| ≥20                                                       | 932               | (11.7) | 12678                  | (12.5) |               | 3250               | (15.9) | 34223                  | (14.7) |               |
| <b>Mean ACG score (SD)</b>                                | 0.5               | (0.9)  | 0.5                    | (0.9)  | -0.003        | 1.4                | (2.1)  | 1.3                    | (2.0)  | 0.010         |
| <b>US Region</b>                                          |                   |        |                        |        | 0.277         |                    |        |                        |        | 0.248         |
| Midwest                                                   | 2733              | (34.4) | 27722                  | (27.4) |               | 7638               | (37.5) | 75109                  | (32.2) |               |
| Northeast                                                 | 602               | (7.6)  | 14865                  | (14.7) |               | 1503               | (7.4)  | 33510                  | (14.4) |               |
| South                                                     | 3794              | (47.7) | 44865                  | (44.4) |               | 8814               | (43.2) | 90327                  | (38.8) |               |
| West                                                      | 819               | (10.3) | 13687                  | (13.5) |               | 2432               | (11.9) | 34136                  | (14.6) |               |
| <b>Employer size (no. of employees)</b>                   |                   |        |                        |        | 1.590         |                    |        |                        |        | 1.460         |
| 1-99                                                      | 5193              | (65.2) | 15066                  | (14.9) |               | 13638              | (66.8) | 39555                  | (17.0) |               |
| 100-999                                                   | 2430              | (30.5) | 28416                  | (28.1) |               | 5785               | (28.3) | 68961                  | (29.6) |               |
| 1000+                                                     | 338               | (4.2)  | 57732                  | (57.0) |               | 990                | (4.8)  | 124743                 | (53.5) |               |

<sup>a</sup> We used geocoding to classify participants as from predominantly white, black, Hispanic, or mixed neighborhoods, and used a superseding Hispanic or Asian assignment based on flags created by the E-Tech system (Ethnic Technologies) which analyzes full names and geographic locations of individuals.  
Abbreviation: Std. diff.= standardized mean difference

**eFigure 2.** Aggregate Interrupted Time Series Regression Results for Monthly 30-day Fill Rates for High-Deductible Health Plan (HDHP) and Control Enrollees and the Difference Between Them From Baseline Period (Months 1 – 12) to Follow-Up Period (Months 13-24)

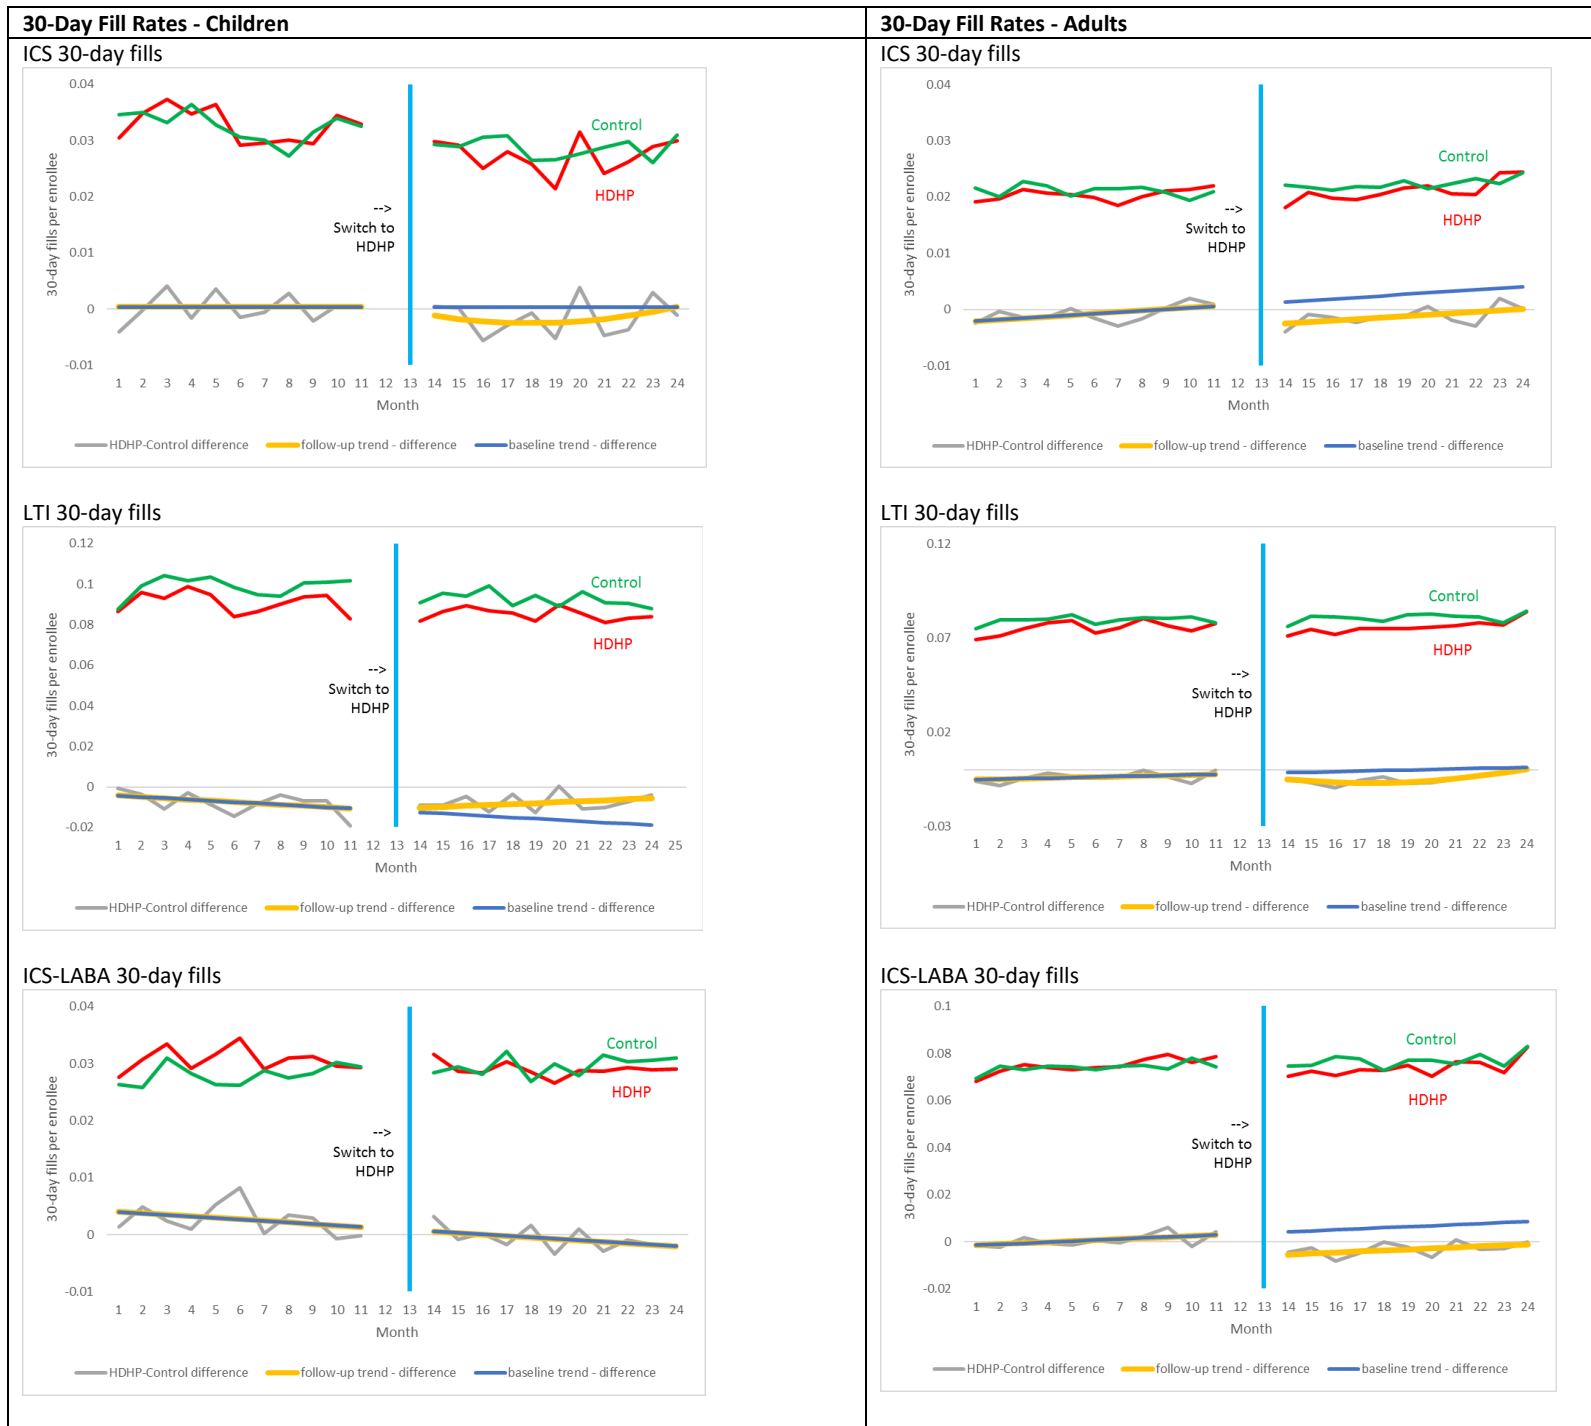

**eFigure 3.** Aggregate Interrupted Time Series Regression Results for Monthly Rates of Asthma Exacerbations (Oral Steroid Bursts (OCS) and Asthma-Related Emergency Department (ED) Visits) for High-Deductible Health Plan (HDHP) and Control Enrollees and the Difference Between Them From Baseline Period (Months 1 – 12) to Follow-Up Period (Months 13-24)

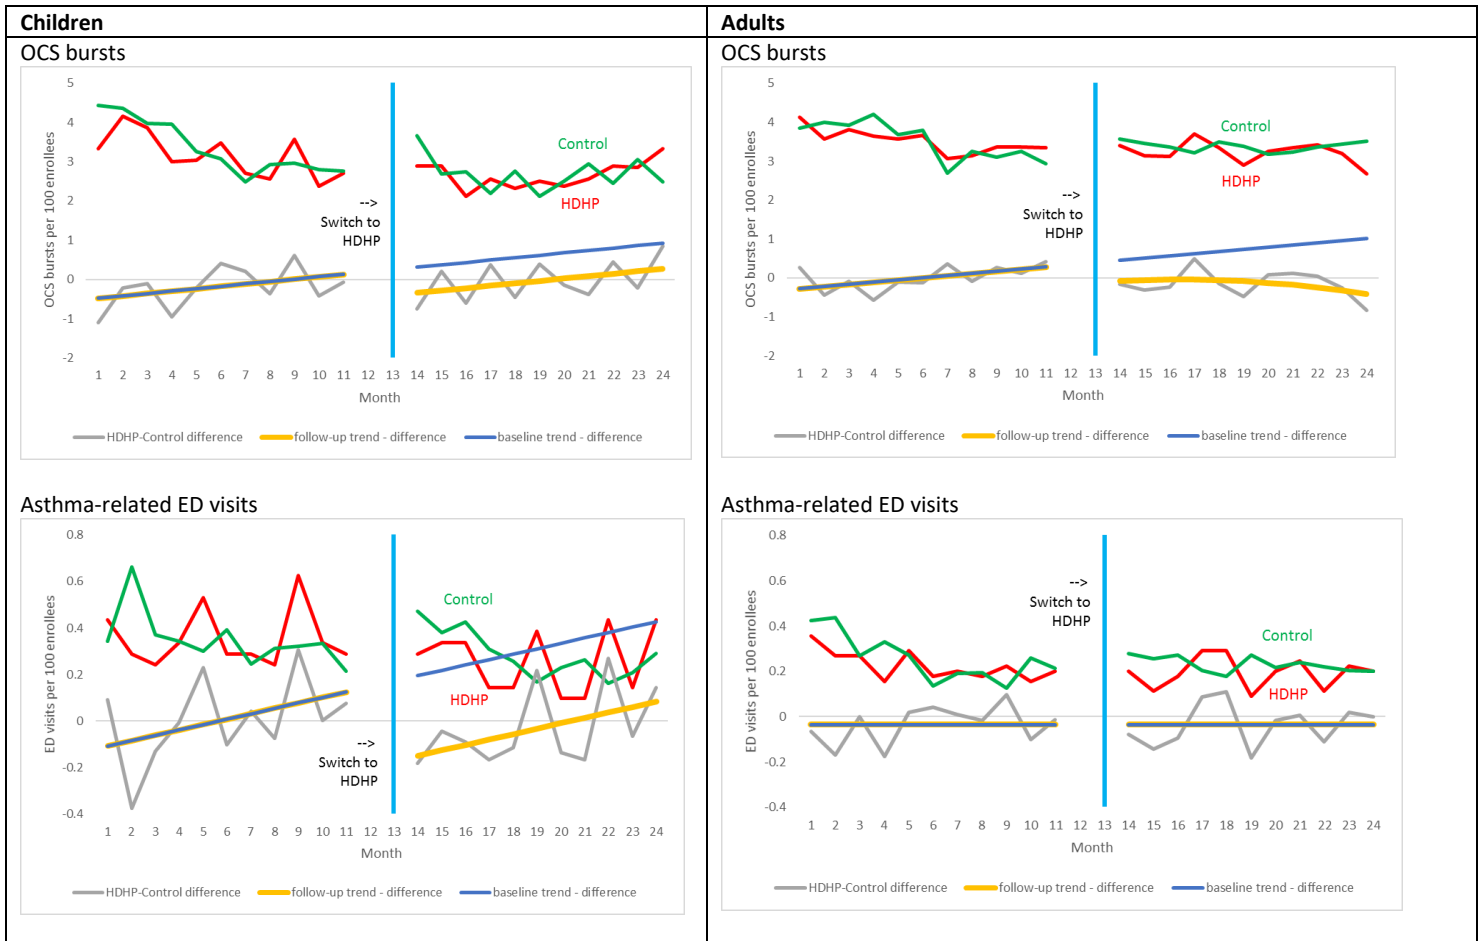

**eTable 2.** Adjusted Rates of Asthma Controller Medication Use, Adherence, and Exacerbations Before and After Switching to an HDHP Compared With a Control Group Remaining in a Traditional Plan, Among Adults and Children With Three or More Controller Fills<sup>a</sup>

|                                             | HDHP    |      | Control  |      | Absolute change for HDHP vs. control group, (95% CI) <sup>b</sup> |
|---------------------------------------------|---------|------|----------|------|-------------------------------------------------------------------|
|                                             | pre     | post | pre      | post |                                                                   |
| 30-day fills, mean rate per enrollee        | n=4,344 |      | n=17,659 |      |                                                                   |
| ICS                                         | 0.97    | 0.80 | 1.03     | 0.90 | -0.05 (-0.10 to 0.01)                                             |
| LTI                                         | 3.82    | 3.82 | 4.10     | 3.64 | -0.1 (-0.2 to 0.03)                                               |
| ICS-LABA                                    | 2.93    | 2.59 | 2.75     | 2.50 | -0.08 (-0.16 to 0.003)                                            |
| Proportion of days covered (%) <sup>c</sup> |         |      |          |      |                                                                   |
| ICS                                         | n=737   |      | n=1,925  |      |                                                                   |
|                                             | 39.3    | 27.0 | 40.1     | 27.5 | -0.04% (-1.9% to 1.9%)                                            |
| LTI                                         | n=2,067 |      | n=7,503  |      |                                                                   |
|                                             | 67.4    | 53.7 | 68.4     | 55.4 | -0.8% (-2.3% to 0.7%)                                             |
| ICS-LABA                                    | n=1,840 |      | n=6,202  |      |                                                                   |
|                                             | 56.1    | 44.4 | 55.6     | 45.4 | -1.4% (-2.8% to -0.1%)                                            |
| Exacerbations, rate per 100 enrollees       | n=4,344 |      | n=17,659 |      |                                                                   |
| OCS bursts                                  | 38.0    | 37.1 | 38.6     | 36.1 | 1.5 (-1.5 to 4.6)                                                 |
| Asthma-related ED visits                    | 2.6     | 2.2  | 3.3      | 3.1  | -0.2 (-1.1 to 0.6)                                                |

<sup>a</sup> Among those with 3 or more fills of any one type of controller in the baseline (pre) period

<sup>b</sup> None of these findings were statistically significant based on Holm-Bonferroni correction.

<sup>c</sup> Among those with at least one fill in the first six months of the baseline (pre) period

HDHP and control groups were matched separately for each controller subgroup for PDC analyses (i.e. ICS users, LTI users, ICS-LABA users).

Abbreviations:

ICS = inhaled corticosteroid

LTI = leukotriene inhibitor

ICS-LABA = inhaled corticosteroid-long-acting beta agonist

OCS = oral corticosteroid

ED = emergency department

**eTable 3.** Adjusted Rates of Asthma Controller Medication Use, Adherence, and Exacerbations Before and After Switching to an HDHP Compared With a Control Group Remaining in a Traditional Plan, Among Adults and Children Between 2009-2014

|                                                    | HDHP    |      | Control  |      | Absolute change for HDHP vs. control group, (95% CI) <sup>a</sup> |
|----------------------------------------------------|---------|------|----------|------|-------------------------------------------------------------------|
|                                                    | pre     | post | pre      | post |                                                                   |
| 30-day fills, mean rate per enrollee               | n=7,976 |      | n=38,610 |      |                                                                   |
| ICS                                                | 0.32    | 0.30 | 0.32     | 0.31 | -0.01 (-0.04 to 0.01)                                             |
| LTI                                                | 0.78    | 0.72 | 0.78     | 0.74 | -0.02 (-0.06 to 0.02)                                             |
| ICS-LABA                                           | 0.53    | 0.50 | 0.52     | 0.52 | -0.04 (-0.07 to -0.01)                                            |
| Proportion of days covered (%) <sup>b</sup>        |         |      |          |      |                                                                   |
| ICS                                                | n=421   |      | n=959    |      |                                                                   |
|                                                    | 32.4    | 20.7 | 31.0     | 19.3 | 0.5% (-1.6% to 2.7%)                                              |
| LTI                                                | n=659   |      | n=1,437  |      |                                                                   |
|                                                    | 52.6    | 40.5 | 55.2     | 44.6 | -2.0% (-4.6% to 0.6%)                                             |
| ICS-LABA                                           | n=540   |      | n=1,274  |      |                                                                   |
|                                                    | 44.0    | 34.4 | 44.9     | 37.5 | -2.3% (-4.6% to -0.04%)                                           |
| Exacerbations, rate per 100 enrollees <sup>c</sup> | n=1,707 |      | n=5,067  |      |                                                                   |
| OCS bursts                                         | 34.8    | 31.0 | 36.1     | 34.7 | -2.4 (-7.0 to 2.2)                                                |
| Asthma-related ED visits                           | 3.1     | 2.1  | 2.3      | 2.7  | -1.6 (-3.4 to 0.2)                                                |

<sup>a</sup> None of these findings were statistically significant based on Holm-Bonferroni correction.

<sup>b</sup> Among those with at least one fill in the first six months of the baseline (pre) period

<sup>c</sup> Among those with any controller fill

HDHP and control groups were matched separately for each controller subgroup for PDC analyses (i.e. ICS users, LTI users, ICS-LABA users), and for users of any controller for exacerbation analyses.

Abbreviations:

ICS = inhaled corticosteroid

LTI = leukotriene inhibitor

ICS-LABA = inhaled corticosteroid-long-acting beta agonist

OCS = oral corticosteroid

ED = emergency department
